# Supplementary material for: Mannose and glycine: Metabolites with potentially causal implications in chronic kidney disease pathogenesis
Source: PLoS One. 2024 Feb 14;19(2):e0298729. doi: 10.1371/journal.pone.0298729 (PMC10866514; doi:10.1371/journal.pone.0298729)
Supplement: S7 Table — (CSV) [file pone.0298729.s014.csv]

	X	id.exposure	id.outcome	outcome	exposure	nsnp	b_Inverse.variance.weighted..multiplicative.random.effects.	se_Inverse.variance.weighted..multiplicative.random.effects.	pval_Inverse.variance.weighted.	FDR
1	1	HT872x	ukiqon	CKD	M00053.metal.pos.txt.gz	8	0.222547964	0.803825367	0.781886774	0.972776174
2	2	2E41sp	DvbuY1	CKD	M00054.metal.pos.txt.gz	194	0.060918049	0.15218161	0.688936776	0.964066887
3	3	Lei0wx	bY8ZlG	CKD	M00059.metal.pos.txt.gz	7	-1.423738156	0.860763753	0.098119273	0.681228095
4	4	BdULj5	o5F1l6	CKD	M00060.metal.pos.txt.gz	208	0.270941496	0.154256653	0.079014481	0.6690017
5	5	eHMtdA	dNz7Fh	CKD	M00063.metal.pos.txt.gz	47	-0.037778267	0.178012636	0.831933539	0.981029293
6	6	x1VoKn	soE7gv	CKD	M00064.metal.pos.txt.gz	5	0.681371513	0.419364222	0.104211013	0.704901515
7	7	CKrP8j	clQU7y	CKD	M00513.metal.pos.txt.gz	26	-0.061531094	0.274583706	0.822688317	0.981029293
8	8	irlvkn	sJBmQ6	CKD	M00527.metal.pos.txt.gz	13	-0.288431216	0.37436538	0.441030772	0.964066887
9	9	efrDCn	am5cBW	CKD	M00542.metal.pos.txt.gz	10	0.051212758	0.058256033	0.379348184	0.964066887
10	10	3A3DQt	L97kIr	CKD	M00553.metal.pos.txt.gz	16	-0.045212992	0.024298264	0.062779503	0.592665401
11	11	gOSuNx	L6z2Un	CKD	M00569.metal.pos.txt.gz	12	0.007242873	0.073197331	0.921178002	0.990129705
12	12	kWV1Aq	lFMvyO	CKD	M00575.metal.pos.txt.gz	4	-0.139601322	0.151952877	0.358244886	0.964066887
13	13	e30j5J	wqovnk	CKD	M00577.metal.pos.txt.gz	3	0.005170134	0.330601888	0.987522752	0.997006815
14	14	w4se4l	eh6rhU	CKD	M00584.metal.pos.txt.gz	21	0.384148149	0.163096891	0.018505912	0.31013356
15	15	WbC2EB	UFx7nR	CKD	M00599.metal.pos.txt.gz	14	-0.180760918	0.148077953	0.222194102	0.930674319
16	16	FUK03j	COepwJ	CKD	M00606.metal.pos.txt.gz	21	-0.252468857	0.220718075	0.252684936	0.930674319
17	17	WiZoBH	DdrhRg	CKD	M01105.metal.pos.txt.gz	17	0.079297665	0.242523045	0.743690874	0.964066887
18	18	6GSA67	DywbGT	CKD	M01107.metal.pos.txt.gz	19	-0.109735772	0.108767678	0.313022324	0.964066887
19	19	j4qu4v	dy5Ffc	CKD	M01110.metal.pos.txt.gz	21	-0.210060663	0.145339241	0.14837005	0.784085733
20	20	NiDQet	sSzDEV	CKD	M01114.metal.pos.txt.gz	17	0.029881911	0.066383172	0.652607436	0.964066887
21	21	dbLqTJ	D8trTf	CKD	M01121.metal.pos.txt.gz	8	0.152620814	0.147288918	0.300108728	0.964066887
22	22	WzcSXk	no4UML	CKD	M01123.metal.pos.txt.gz	11	-0.014157211	0.033122693	0.669075436	0.964066887
23	23	RBATEt	5CIqbV	CKD	M01125.metal.pos.txt.gz	18	0.285543537	0.341152083	0.402593815	0.964066887
24	24	BaU5CL	GK034a	CKD	M01284.metal.pos.txt.gz	20	-0.068013043	0.345105972	0.843765935	0.981029293
25	25	qnJso9	6pIsWB	CKD	M01299.metal.pos.txt.gz	33	-0.117140543	0.255596039	0.646734457	0.964066887
26	26	OBsMPL	6sa0yW	CKD	M01301.metal.pos.txt.gz	25	-0.358094155	0.206779505	0.083314856	0.6690017
27	27	RsXoVP	YsSdBt	CKD	M01302.metal.pos.txt.gz	22	0.146589187	0.386214098	0.704276357	0.964066887
28	28	BH24ad	K15XbO	CKD	M01303.metal.pos.txt.gz	17	-0.274197435	0.24797127	0.268829149	0.930674319
29	29	RbyEC1	BBqxg7	CKD	M01336.metal.pos.txt.gz	28	0.466636692	0.154545769	0.002532694	0.078681913
30	30	LGGHCa	z7iXAk	CKD	M01356.metal.pos.txt.gz	16	0.109801745	0.157994392	0.487072585	0.964066887
31	31	N5GKN5	MfMv6I	CKD	M01358.metal.pos.txt.gz	43	0.341195738	0.155394443	0.028115193	0.351691981
32	32	5OXG1Q	1egIt3	CKD	M01359.metal.pos.txt.gz	20	0.060784874	0.157620262	0.699762383	0.964066887
33	33	L2GF8l	dw5l5l	CKD	M01361.metal.pos.txt.gz	20	0.1993394	0.155787047	0.200698736	0.911584913
34	34	s79d9w	qFaBQN	CKD	M01365.metal.pos.txt.gz	23	0.071965792	0.156535046	0.645701157	0.964066887
35	35	PQ0Vbu	Dye7kP	CKD	M01444.metal.pos.txt.gz	16	-0.061285572	0.141585939	0.665123243	0.964066887
36	36	XHPGEF	u53jmh	CKD	M01493.metal.pos.txt.gz	11	-0.144582015	0.284662645	0.611518897	0.964066887
37	37	3GvI6e	1DE36S	CKD	M01494.metal.pos.txt.gz	23	0.152779628	0.20319216	0.452112848	0.964066887
38	38	d1cHkq	LOuPDk	CKD	M01508.metal.pos.txt.gz	26	0.034116072	0.111503632	0.759632231	0.966076748
39	39	kbOx0H	mvBQcA	CKD	M01515.metal.pos.txt.gz	18	0.013719258	0.017365861	0.429520107	0.964066887
40	40	gTuv1N	Vds0LC	CKD	M01558.metal.pos.txt.gz	35	0.079539517	0.20575799	0.699075826	0.964066887
41	41	ZcNlRM	L1zcYp	CKD	M01561.metal.pos.txt.gz	11	0.120136215	0.12450569	0.334592186	0.964066887
42	42	4WxDpP	I07WIm	CKD	M01564.metal.pos.txt.gz	45	-0.011064676	0.17663713	0.950052606	0.990129705
43	43	TzdVCP	SKDuCi	CKD	M01572.metal.pos.txt.gz	17	0.086373508	0.206548306	0.67581857	0.964066887
44	44	D3nDc8	wKMHir	CKD	M01573.metal.pos.txt.gz	13	0.097397252	0.071359151	0.172288239	0.843663218
45	45	Y2zoDD	2TDoTK	CKD	M01585.metal.pos.txt.gz	23	0.506506127	0.428352597	0.23702664	0.930674319
46	46	ZLSgyA	jOGFgx	CKD	M01604.metal.pos.txt.gz	22	0.086072733	0.213981197	0.687504187	0.964066887
47	47	3MQQWU	Ex6peW	CKD	M01605.metal.pos.txt.gz	11	0.129772956	0.120127861	0.280012953	0.930708455
48	48	f7tfhi	UjIqIM	CKD	M01638.metal.pos.txt.gz	22	-0.109008912	0.260948287	0.676136175	0.964066887
49	49	wFMGaz	bm0FuD	CKD	M01640.metal.pos.txt.gz	14	-0.001450326	0.032960247	0.964902583	0.990129705
50	50	UgQXa4	NrcIiF	CKD	M01644.metal.pos.txt.gz	36	0.181005355	0.161746019	0.263109651	0.930674319
51	51	1MouWY	Iyn8fx	CKD	M01645.metal.pos.txt.gz	41	0.077515372	0.164450917	0.637384598	0.964066887
52	52	4wUqjD	oktVF1	CKD	M01649.metal.pos.txt.gz	5	-0.459205463	0.708165684	0.516698117	0.964066887
53	53	0JFyKn	0B7CkS	CKD	M01670.metal.pos.txt.gz	14	0.302197952	0.445580435	0.49763735	0.964066887
54	54	qvt0oa	Gqg6Sz	CKD	M01712.metal.pos.txt.gz	13	-0.244205325	0.139808824	0.080687836	0.6690017
55	55	Uks6Hr	vj3rIV	CKD	M01769.metal.pos.txt.gz	40	-0.059961909	0.161346524	0.710165118	0.964066887
56	56	OEAWlI	MSpPoY	CKD	M01898.metal.pos.txt.gz	38	0.333091327	0.111247958	0.002752248	0.078681913
57	57	Z2d8JK	nrkBz4	CKD	M02132.metal.pos.txt.gz	47	0.450501452	0.199515237	0.023946895	0.314545702
58	58	Jg9d9j	2puqI5	CKD	M02137.metal.pos.txt.gz	19	0.078792109	0.07124905	0.268783259	0.930674319
59	59	fu2cpk	H16GK4	CKD	M02342.metal.pos.txt.gz	16	0.029229374	0.105640062	0.782019425	0.972776174
60	60	7x1Nji	jmlqx1	CKD	M02730.metal.pos.txt.gz	22	0.018632833	0.278580264	0.946673277	0.990129705
61	61	iwLWS9	1GP8SH	CKD	M02734.metal.pos.txt.gz	47	0.010777247	0.187900911	0.954261601	0.990129705
62	62	J34kkq	mTtREA	CKD	M03127.metal.pos.txt.gz	25	0.149856348	0.204604384	0.463912239	0.964066887
63	63	c6RL2n	HlfpQL	CKD	M03141.metal.pos.txt.gz	25	-0.872964529	0.206569733	2.38E-05	0.0038556
64	64	WR1AVd	0tUCgg	CKD	M03147.metal.pos.txt.gz	5	-0.186323609	0.306893406	0.543765907	0.964066887
65	65	aNpNdd	3nKHfe	CKD	M10642.metal.pos.txt.gz	32	-0.543410173	0.176495744	0.002077766	0.078681913
66	66	E4Vhcq	ZbCmEB	CKD	M11438.metal.pos.txt.gz	5	0.217800556	0.153575099	0.156131716	0.798736989
67	67	AcjKMv	uyewMU	CKD	M12017.metal.pos.txt.gz	16	-0.077199172	0.219697672	0.725297124	0.964066887
68	68	8BSURV	617dVr	CKD	M12035.metal.pos.txt.gz	36	-0.012896461	0.158701616	0.935233341	0.990129705
69	69	Kw9su6	CBNTq9	CKD	M12067.metal.pos.txt.gz	28	-0.237892471	0.245096795	0.331744414	0.964066887
70	70	NSPv0o	EOOBSy	CKD	M12129.metal.pos.txt.gz	23	-0.014668253	0.177748262	0.934231126	0.990129705
71	71	vGcSsj	UveUGF	CKD	M12261.metal.pos.txt.gz	13	0.105491163	0.062964975	0.093856886	0.680812636
72	72	Y7mWMA	O0vpzV	CKD	M12593.metal.pos.txt.gz	25	0.634975549	0.341641652	0.063083701	0.592665401
73	73	uUp7zd	eaWS7Z	CKD	M12626.metal.pos.txt.gz	9	0.173875655	0.660764219	0.792440157	0.972800651
74	74	N3Yc5l	O4TnN8	CKD	M12768.metal.pos.txt.gz	18	-0.111710781	0.140827783	0.427635728	0.964066887
75	75	JrSDZb	cWwdJV	CKD	M12774.metal.pos.txt.gz	33	0.183328524	0.189890206	0.33432204	0.964066887
76	76	4xuNFP	kmjFCc	CKD	M15122.metal.pos.txt.gz	18	-0.046439491	0.155566718	0.765307712	0.966076748
77	77	N4iABU	QVmgHI	CKD	M15140.metal.pos.txt.gz	43	0.248059756	0.196325568	0.206405154	0.920301879
78	78	YWuj4O	Sxhyc1	CKD	M15335.metal.pos.txt.gz	13	0.05193485	0.054354858	0.339336226	0.964066887
79	79	5pEodu	Ig5P8k	CKD	M15365.metal.pos.txt.gz	14	-0.108899832	0.140195971	0.437295288	0.964066887
80	80	8T9nAZ	oVHgNW	CKD	M15488.metal.pos.txt.gz	18	-0.255934462	0.257887008	0.320988456	0.964066887
81	81	LkEl3P	WEw5tm	CKD	M15500.metal.pos.txt.gz	228	0.046650848	0.140623626	0.740083627	0.964066887
82	82	I1di94	MjwwKh	CKD	M15506.metal.pos.txt.gz	24	-0.976286784	0.362774474	0.007120249	0.176619836
83	83	7lsJhJ	A38bkD	CKD	M15630.metal.pos.txt.gz	25	0.233128377	0.053145419	1.15E-05	0.0027945
84	84	dKEVlT	bzl4md	CKD	M15650.metal.pos.txt.gz	8	-0.353716759	1.073639359	0.741811166	0.964066887
85	85	86MaIP	YXZkjF	CKD	M15676.metal.pos.txt.gz	34	-0.111980687	0.183894926	0.542565254	0.964066887
86	86	bsUg1h	xzLEsL	CKD	M15677.metal.pos.txt.gz	10	-0.054354048	0.080978383	0.502082456	0.964066887
87	87	htMaSy	GP20M3	CKD	M15749.metal.pos.txt.gz	16	0.134222795	0.111033059	0.226718814	0.930674319
88	88	r6vjEr	8lDjbo	CKD	M15753.metal.pos.txt.gz	15	0.142903228	0.057296371	0.012627479	0.25570645
89	89	OHbdJK	1eq7mJ	CKD	M15778.metal.pos.txt.gz	42	-0.213468074	0.184018331	0.246033739	0.930674319
90	90	Uu2hVn	g7igk5	CKD	M15958.metal.pos.txt.gz	9	-0.15701501	0.134144217	0.241802201	0.930674319
91	91	jhaqIP	RqgCs0	CKD	M15990.metal.pos.txt.gz	19	-0.070815307	0.083976809	0.399076242	0.964066887
92	92	0j4Tbc	UHDknR	CKD	M15996.metal.pos.txt.gz	4	-0.288712689	0.126980772	0.022985685	0.311571563
93	93	6bKlcM	JTSnH1	CKD	M16634.metal.pos.txt.gz	10	-0.100235949	0.087740997	0.253284791	0.930674319
94	94	S9jSj3	aRFNkz	CKD	M16816.metal.pos.txt.gz	14	0.179826615	0.232067468	0.438405031	0.964066887
95	95	uurvLJ	ujH1Zr	CKD	M16818.metal.pos.txt.gz	11	0.151733393	0.17462288	0.384890639	0.964066887
96	96	qUUQTi	UB2TgY	CKD	M16821.metal.pos.txt.gz	23	-0.041592751	0.105414597	0.693165066	0.964066887
97	97	1IhOZX	IDLNIw	CKD	M16822.metal.pos.txt.gz	21	-0.099301016	0.198876746	0.61756148	0.964066887
98	98	Lc1b6w	5SqYNY	CKD	M16823.metal.pos.txt.gz	11	0.024347412	0.045696608	0.594168107	0.964066887
99	99	xrGE5U	tMfQNk	CKD	M17799.metal.pos.txt.gz	124	-0.018173234	0.016053494	0.257616667	0.930674319
100	100	615buD	XGvqNT	CKD	M17805.metal.pos.txt.gz	9	0.009195812	0.19245444	0.961890173	0.990129705
101	101	Ric6Cd	vePREZ	CKD	M17807.metal.pos.txt.gz	23	0.017498131	0.065761831	0.790174992	0.972800651
102	102	vAEvB2	wWpTqP	CKD	M17945.metal.pos.txt.gz	36	-0.101112437	0.167835227	0.546874223	0.964066887
103	103	hmLOKe	cy1hoK	CKD	M18254.metal.pos.txt.gz	13	0.029287983	0.061773411	0.635414638	0.964066887
104	104	LAD3JX	dL99Sn	CKD	M18281.metal.pos.txt.gz	13	-0.001712005	0.020842927	0.934536639	0.990129705
105	105	de2kDd	Zr39ON	CKD	M18283.metal.pos.txt.gz	10	0.164831478	0.041716105	7.77E-05	0.0062937
106	106	Uda0jH	3ajxuE	CKD	M18335.metal.pos.txt.gz	6	0.012296107	0.146273424	0.933006757	0.990129705
107	107	d1DV2n	cbdJbF	CKD	M18349.metal.pos.txt.gz	19	0.145733967	0.422742989	0.730294203	0.964066887
108	108	xBai77	MRil4b	CKD	M18357.metal.pos.txt.gz	7	-0.061445823	0.08843263	0.487160576	0.964066887
109	109	PatoAh	byPi3J	CKD	M18369.metal.pos.txt.gz	37	-0.014352259	0.229851126	0.950211214	0.990129705
110	110	oPIwOL	YGCWOD	CKD	M18392.metal.pos.txt.gz	6	0.003365614	0.254078679	0.989431253	0.997006815
111	111	WoCX12	brff7d	CKD	M18394.metal.pos.txt.gz	14	-0.011135886	0.067172218	0.868329204	0.990129705
112	112	PRLUPD	VpMLOg	CKD	M18467.metal.pos.txt.gz	12	0.001201658	0.135112587	0.992903906	0.997006815
113	113	bNeuuP	t7PC1U	CKD	M18474.metal.pos.txt.gz	13	0.006528533	0.041697109	0.875583436	0.990129705
114	114	ITNyq8	C3hryK	CKD	M18476.metal.pos.txt.gz	9	0.046285387	0.056345709	0.411387927	0.964066887
115	115	AfZelx	T62bsK	CKD	M18477.metal.pos.txt.gz	7	0.041364015	0.083108301	0.61868691	0.964066887
116	116	5aRErw	FoeV3p	CKD	M18494.metal.pos.txt.gz	13	-0.036739682	0.065661682	0.57580005	0.964066887
117	117	gfKzUc	K20fZs	CKD	M18497.metal.pos.txt.gz	16	-0.02908862	0.029909941	0.330781876	0.964066887
118	118	0AA81p	P1vjtU	CKD	M18929.metal.pos.txt.gz	13	0.151808033	0.103623515	0.142922016	0.780450559
119	119	U2i664	M2UHuU	CKD	M19323.metal.pos.txt.gz	6	-0.032522442	0.168998661	0.847395986	0.982898447
120	120	fnpkvV	XdCysX	CKD	M19324.metal.pos.txt.gz	7	-0.212509382	0.082685076	0.01016675	0.235287643
121	121	aItNx7	s5MsZJ	CKD	M19362.metal.pos.txt.gz	23	0.009576477	0.236638371	0.967719362	0.990129705
122	122	rE8Bp1	YoHUPJ	CKD	M19364.metal.pos.txt.gz	21	-0.097996419	0.202523825	0.628473871	0.964066887
123	123	OvorvS	0nsB8C	CKD	M19368.metal.pos.txt.gz	12	0.124708218	0.194070633	0.520488937	0.964066887
124	124	EitHj9	4SEp3P	CKD	M19396.metal.pos.txt.gz	8	-0.059155467	0.122973464	0.630486265	0.964066887
125	125	o6R5YQ	P9mjog	CKD	M19414.metal.pos.txt.gz	14	0.127676725	0.144893197	0.378221382	0.964066887
126	126	5rcqKK	2ZBPjq	CKD	M19415.metal.pos.txt.gz	6	-0.095671719	0.411578683	0.816188039	0.980831497
127	127	WKfnYZ	0wmwt2	CKD	M19934.metal.pos.txt.gz	40	0.22063453	0.193089593	0.253182417	0.930674319
128	128	5rTi8P	c6LHoP	CKD	M20489.metal.pos.txt.gz	38	-0.115068709	0.175803553	0.512770371	0.964066887
129	129	i7PGan	dMX1hc	CKD	M20675.metal.pos.txt.gz	31	0.174535343	0.141564021	0.217610277	0.930674319
130	130	PAvAlQ	TSed3Q	CKD	M20699.metal.pos.txt.gz	26	0.098438089	0.136310957	0.470197158	0.964066887
131	131	KNiuPB	bCyJZM	CKD	M21044.metal.pos.txt.gz	18	-0.280591777	0.184906107	0.129144915	0.770926299
132	132	3noK01	tV1Y41	CKD	M21047.metal.pos.txt.gz	18	-0.308561586	0.229385812	0.178572209	0.843663218
133	133	aG0Mv5	qrRmjv	CKD	M21049.metal.pos.txt.gz	15	-0.07337768	0.07260429	0.312182957	0.964066887
134	134	k7Tq99	ZlwFP6	CKD	M21127.metal.pos.txt.gz	14	-0.296496417	0.274744209	0.280510801	0.930708455
135	135	Z1T3o6	gbBoP7	CKD	M21151.metal.pos.txt.gz	10	0.019404818	0.032756315	0.553583238	0.964066887
136	136	aZOeSD	ksDI09	CKD	M21184.metal.pos.txt.gz	16	-0.007816697	0.096994824	0.935768966	0.990129705
137	137	k47okd	I8SDnW	CKD	M21188.metal.pos.txt.gz	25	-0.131725851	0.153486768	0.390769421	0.964066887
138	138	WiYOgz	hcYSCc	CKD	M21630.metal.pos.txt.gz	22	0.027343267	0.116881167	0.815030981	0.980831497
139	139	DL0Bbv	6khUmX	CKD	M22030.metal.pos.txt.gz	19	0.323301375	0.354687365	0.362026281	0.964066887
140	140	Lo9cO5	FIOKHk	CKD	M22032.metal.pos.txt.gz	16	0.183567859	0.204590574	0.369588226	0.964066887
141	141	slsA5J	djv9gf	CKD	M22116.metal.pos.txt.gz	14	0.030426754	0.265729376	0.908839237	0.990129705
142	142	V88FKb	AVLE5F	CKD	M22130.metal.pos.txt.gz	19	0.307586622	0.206215599	0.135809845	0.770926299
143	143	EJzE5Q	sa51oy	CKD	M22138.metal.pos.txt.gz	7	0.401455439	0.288828396	0.164545732	0.822643526
144	144	ZhCwC4	tWakIS	CKD	M22175.metal.pos.txt.gz	7	0.036619057	0.105653776	0.7288957	0.964066887
145	145	8emsG6	FNvKfm	CKD	M22177.metal.pos.txt.gz	60	-0.112557886	0.124424171	0.365661231	0.964066887
146	146	t4avdg	D9Pnhu	CKD	M22189.metal.pos.txt.gz	10	0.111923337	0.162672756	0.491435433	0.964066887
147	147	zVAxU8	CLaAua	CKD	M22481.metal.pos.txt.gz	36	0.326468326	0.13745546	0.017544935	0.304529943
148	148	651LZy	xCV3tJ	CKD	M22548.metal.pos.txt.gz	15	-0.099064653	0.208055752	0.633971262	0.964066887
149	149	W7HkNz	LCHtAA	CKD	M22649.metal.pos.txt.gz	13	-0.088051575	0.214830901	0.681905295	0.964066887
150	150	KrsYC6	a8Fi1w	CKD	M22842.metal.pos.txt.gz	9	0.05265287	0.07248452	0.46759262	0.964066887
151	151	mcFIch	KNCLrS	CKD	M24074.metal.pos.txt.gz	22	0.126452476	0.228094788	0.579314947	0.964066887
152	152	cRgaHX	bnYg0E	CKD	M25459.metal.pos.txt.gz	31	0.107039036	0.097807999	0.273788717	0.930674319
153	153	iMC4vJ	9Qwum1	CKD	M25599.metal.pos.txt.gz	22	0.074176312	0.159049109	0.640948074	0.964066887
154	154	t3BzFS	SxAyHr	CKD	M27256.metal.pos.txt.gz	37	0.046678111	0.215393042	0.828433324	0.981029293
155	155	REc9f9	Bzj38S	CKD	M27273.metal.pos.txt.gz	13	-0.030758409	0.255590969	0.904211985	0.990129705
156	156	9JrBmt	BYQnTg	CKD	M27278.metal.pos.txt.gz	22	0.032880727	0.141127102	0.815771791	0.980831497
157	157	v811BD	3TKHkB	CKD	M27447.metal.pos.txt.gz	15	0.016333167	0.07010086	0.815765093	0.980831497
158	158	1GEUC4	BXsoPR	CKD	M27513.metal.pos.txt.gz	22	-6.75E-05	0.107650127	0.999499749	0.999951901
159	159	USeTgR	GSbqnp	CKD	M27531.metal.pos.txt.gz	16	-0.087818494	0.057550966	0.127028383	0.770926299
160	160	lKNUWi	YG97Vg	CKD	M27672.metal.pos.txt.gz	5	-0.182614877	0.35583751	0.60781326	0.964066887
161	161	7tllzn	AffT7u	CKD	M27710.metal.pos.txt.gz	16	0.129534128	0.113855206	0.255241885	0.930674319
162	162	r8nrZv	Sp3MGK	CKD	M27716.metal.pos.txt.gz	11	0.028173076	0.046377836	0.543540022	0.964066887
163	163	tbyMwZ	W7uxd3	CKD	M27718.metal.pos.txt.gz	8	0.53955869	0.41094661	0.1891946	0.87570072
164	164	z81Qjr	tzeuIp	CKD	M27722.metal.pos.txt.gz	8	-0.075242029	0.225942287	0.739123433	0.964066887
165	165	UAAurB	5ZZQLL	CKD	M27728.metal.pos.txt.gz	32	-0.02928506	0.132671268	0.825299553	0.981029293
166	166	Z7gNUY	QQtbK0	CKD	M27738.metal.pos.txt.gz	18	0.130722191	0.114924676	0.25534615	0.930674319
167	167	jouMuE	xdzKAG	CKD	M30805.metal.pos.txt.gz	16	-0.079578174	0.117392819	0.497848163	0.964066887
168	168	jFWXhh	dJdeMo	CKD	M31453.metal.pos.txt.gz	19	-0.211631559	0.27009858	0.433313297	0.964066887
169	169	DIGuhF	0zHtiU	CKD	M31522.metal.pos.txt.gz	4	-0.003594937	0.086315109	0.966778522	0.990129705
170	170	MZR7nV	dOeUFm	CKD	M31536.metal.pos.txt.gz	26	0.009908812	0.021621609	0.646749256	0.964066887
171	171	DRPGXq	Nfdyj8	CKD	M31548.metal.pos.txt.gz	13	-0.003853098	0.072061773	0.957357933	0.990129705
172	172	VtCqyi	eDSyLx	CKD	M31555.metal.pos.txt.gz	12	0.128677539	0.181573837	0.478523788	0.964066887
173	173	GDSZEF	8SQPQY	CKD	M31591.metal.pos.txt.gz	21	-0.006606746	0.031935765	0.836106629	0.981029293
174	174	i3DaqG	sCEWFE	CKD	M31787.metal.pos.txt.gz	14	-0.058737628	0.075585202	0.437096907	0.964066887
175	175	vPzfHx	Zb3BLQ	CKD	M32197.metal.pos.txt.gz	22	-0.03952488	0.194102102	0.838643174	0.981029293
176	176	rUNKi0	h7QRma	CKD	M32198.metal.pos.txt.gz	21	0.201234768	0.214431418	0.348009358	0.964066887
177	177	1yQvjn	4hEcM2	CKD	M32315.metal.pos.txt.gz	35	0.165630999	0.21709142	0.445490194	0.964066887
178	178	jCxcYZ	woevX5	CKD	M32319.metal.pos.txt.gz	6	-0.066577815	0.193721486	0.731088448	0.964066887
179	179	L4wGJ8	89hi40	CKD	M32322.metal.pos.txt.gz	3	0.213095278	0.384022118	0.578960561	0.964066887
180	180	qk1EDE	6YkkjZ	CKD	M32328.metal.pos.txt.gz	19	0.066632653	0.120307569	0.579679765	0.964066887
181	181	2LOtKo	kGEoUD	CKD	M32338.metal.pos.txt.gz	26	0.453042487	0.116145464	9.59E-05	0.0066582
182	182	zXRZCh	oAU0JI	CKD	M32339.metal.pos.txt.gz	39	-0.130721212	0.216645469	0.546250802	0.964066887
183	183	1hY8Xn	Xe0yP4	CKD	M32346.metal.pos.txt.gz	14	0.036620413	0.05980332	0.540307874	0.964066887
184	184	Fe1GJN	uPpzOg	CKD	M32348.metal.pos.txt.gz	46	-0.007760267	0.170571837	0.963712287	0.990129705
185	185	1SS4gE	J99Svg	CKD	M32379.metal.pos.txt.gz	12	-0.06630954	0.130271859	0.610745965	0.964066887
186	186	wfGZ4d	fwoRt8	CKD	M32388.metal.pos.txt.gz	7	0.094298814	0.111245255	0.396624039	0.964066887
187	187	NQIldN	Mm852f	CKD	M32393.metal.pos.txt.gz	15	-0.161344972	0.333253202	0.628278494	0.964066887
188	188	hZNWqy	1AdUZE	CKD	M32405.metal.pos.txt.gz	17	-0.040221032	0.123834681	0.745335331	0.964066887
189	189	oCT3I8	2O3sG5	CKD	M32412.metal.pos.txt.gz	40	0.051932124	0.061989959	0.402170797	0.964066887
190	190	xjZx37	ptdiOI	CKD	M32418.metal.pos.txt.gz	15	-0.014413728	0.153263126	0.925072905	0.990129705
191	191	ieElDW	4Djf0A	CKD	M32425.metal.pos.txt.gz	22	0.047174565	0.081583058	0.563102284	0.964066887
192	192	GlKJYs	MOpGiV	CKD	M32445.metal.pos.txt.gz	14	-0.125016614	0.074041688	0.091322482	0.672465549
193	193	JQLLE0	rUmEC6	CKD	M32452.metal.pos.txt.gz	37	-0.076251672	0.156565521	0.626239034	0.964066887
194	194	fvzxhg	Vo4pZy	CKD	M32489.metal.pos.txt.gz	37	0.020509367	0.173919664	0.906127581	0.990129705
195	195	OKXJq9	DUVbFM	CKD	M32492.metal.pos.txt.gz	45	0.092525555	0.136288457	0.49720438	0.964066887
196	196	ktGl56	AFekNe	CKD	M32497.metal.pos.txt.gz	28	0.087177808	0.110188728	0.428845896	0.964066887
197	197	6hFwBu	BRc4k5	CKD	M32504.metal.pos.txt.gz	11	-0.051822843	0.138329276	0.707932723	0.964066887
198	198	gzUL17	lPMXmd	CKD	M32518.metal.pos.txt.gz	41	0.01199976	0.171572619	0.944241549	0.990129705
199	199	y9Zhkv	Z5L769	CKD	M32549.metal.pos.txt.gz	9	-0.095901964	0.069215563	0.165882851	0.822643526
200	200	dyPcAU	C0ODbU	CKD	M32553.metal.pos.txt.gz	17	0.411481922	0.176689147	0.019867193	0.311466316
201	201	RabC3s	wqY5GA	CKD	M32557.metal.pos.txt.gz	14	0.359787637	0.16654071	0.030744928	0.373550875
202	202	y5AnbV	Lz300m	CKD	M32560.metal.pos.txt.gz	13	0.069327804	0.038405263	0.071048998	0.639440982
203	203	XOACBY	t2ijZl	CKD	M32564.metal.pos.txt.gz	20	0.030325107	0.060794216	0.617909258	0.964066887
204	204	d2NgHz	1KrzLQ	CKD	M32578.metal.pos.txt.gz	17	-0.045466726	0.164062203	0.7816795	0.972776174
205	205	pO959U	bPDI9p	CKD	M32586.metal.pos.txt.gz	10	-0.037960428	0.078473931	0.62857539	0.964066887
206	206	SspSE3	dMkcPu	CKD	M32587.metal.pos.txt.gz	13	0.095163726	0.139815598	0.49610095	0.964066887
207	207	AfcoZ0	DJucyS	CKD	M32593.metal.pos.txt.gz	13	-0.134994179	0.116737822	0.247522616	0.930674319
208	208	Af4ZJk	TIxej9	CKD	M32616.metal.pos.txt.gz	12	0.040474227	0.096491246	0.674879916	0.964066887
209	209	D6eX9A	WUID48	CKD	M32632.metal.pos.txt.gz	28	-0.060095622	0.103323091	0.560817153	0.964066887
210	210	eRxRHT	KdE3f0	CKD	M32634.metal.pos.txt.gz	44	-0.095157438	0.179274737	0.595563534	0.964066887
211	211	0kU2OA	tbAnXS	CKD	M32635.metal.pos.txt.gz	13	-0.214580135	0.194026276	0.268755357	0.930674319
212	212	8BQJyo	UshcK2	CKD	M32644.metal.pos.txt.gz	39	-0.153491907	0.175849968	0.382740928	0.964066887
213	213	O02g2A	gX1p0n	CKD	M32651.metal.pos.txt.gz	26	0.2381759	0.132733287	0.0727502	0.642847222
214	214	riOIZ8	2ytry5	CKD	M32654.metal.pos.txt.gz	27	0.011235396	0.173972593	0.948507285	0.990129705
215	215	UrwW1e	VkWJsh	CKD	M32672.metal.pos.txt.gz	18	0.097115179	0.15448748	0.529592524	0.964066887
216	216	njxVF4	SLXbLU	CKD	M32675.metal.pos.txt.gz	22	0.180663072	0.303719489	0.551953572	0.964066887
217	217	zbcEfE	E5koM7	CKD	M32691.metal.pos.txt.gz	18	-0.055229223	0.061727252	0.370931455	0.964066887
218	218	WDTm7i	BFcRmw	CKD	M32698.metal.pos.txt.gz	17	0.028103327	0.185036077	0.879281381	0.990129705
219	219	IKCwFp	yG7Tz8	CKD	M32709.metal.pos.txt.gz	30	0.190299351	0.114897542	0.097670678	0.681228095
220	220	9omsNu	NtedGK	CKD	M32729.metal.pos.txt.gz	47	0.1153395	0.154351749	0.454912057	0.964066887
221	221	EbFhYo	uThwyy	CKD	M32735.metal.pos.txt.gz	17	-0.140932333	0.097929742	0.150117443	0.784484702
222	222	j47OMR	MypKf6	CKD	M32739.metal.pos.txt.gz	8	0.532270908	0.251676295	0.034438231	0.39849953
223	223	33838D	HZ2P42	CKD	M32740.metal.pos.txt.gz	52	0.23261866	0.228783045	0.309265095	0.964066887
224	224	3sLjLN	X61GfK	CKD	M32753.metal.pos.txt.gz	12	0.027564773	0.122136175	0.821443431	0.981029293
225	225	OUygH6	qzdVq8	CKD	M32754.metal.pos.txt.gz	15	-0.0182422	0.051656667	0.723981102	0.964066887
226	226	DED0YB	EVDq4B	CKD	M32755.metal.pos.txt.gz	24	0.046865013	0.113655919	0.680089387	0.964066887
227	227	6vSX7R	QIjliv	CKD	M32757.metal.pos.txt.gz	19	-0.033028787	0.0625249	0.597325736	0.964066887
228	228	qcKjWu	LyPuzG	CKD	M32758.metal.pos.txt.gz	15	0.05425778	0.075904261	0.47472112	0.964066887
229	229	DQ054A	yBFoCq	CKD	M32759.metal.pos.txt.gz	18	0.028417721	0.085064754	0.738325506	0.964066887
230	230	oH9XaN	lGU0Y6	CKD	M32761.metal.pos.txt.gz	13	-0.048174569	0.169909607	0.776770146	0.972776174
231	231	4SgtkU	WpMr1I	CKD	M32762.metal.pos.txt.gz	15	0.023535361	0.047491016	0.620194278	0.964066887
232	232	ZvNPIz	gQ6hIm	CKD	M32769.metal.pos.txt.gz	6	0.118445985	0.208030769	0.569106683	0.964066887
233	233	3zDAPk	eQV7CN	CKD	M32786.metal.pos.txt.gz	19	-0.100291146	0.06554646	0.125997613	0.770926299
234	234	f5w6A0	I6uJ38	CKD	M32787.metal.pos.txt.gz	15	-0.019168594	0.180732899	0.915534471	0.990129705
235	235	5UU4nF	SFThfG	CKD	M32795.metal.pos.txt.gz	13	0.002875752	0.114275455	0.979923285	0.996947019
236	236	sMNb4T	YnCfHq	CKD	M32800.metal.pos.txt.gz	12	-0.031858949	0.046477122	0.493043641	0.964066887
237	237	REBDEt	jvtwOw	CKD	M32802.metal.pos.txt.gz	6	0.024285722	0.167558426	0.884759171	0.990129705
238	238	cnpRL3	DWn0er	CKD	M32808.metal.pos.txt.gz	13	0.08014121	0.072942427	0.271902738	0.930674319
239	239	1FCIEh	VNG8E9	CKD	M32814.metal.pos.txt.gz	15	0.054572722	0.161525859	0.73547058	0.964066887
240	240	ofb282	n56v60	CKD	M32836.metal.pos.txt.gz	6	0.213507832	0.091465688	0.019580319	0.311466316
241	241	58VJRI	5eaenl	CKD	M32838.metal.pos.txt.gz	12	0.264195845	0.22945103	0.249557089	0.930674319
242	242	c4g7qH	sx5JkF	CKD	M32846.metal.pos.txt.gz	13	0.009387557	0.03126841	0.764005579	0.966076748
243	243	DHnO7N	544i82	CKD	M32847.metal.pos.txt.gz	13	-0.050341409	0.053666067	0.348219147	0.964066887
244	244	uhqQ09	0W3MRx	CKD	M32854.metal.pos.txt.gz	6	-0.034099897	0.105475832	0.746471206	0.964066887
245	245	6Q6IYa	X72Gke	CKD	M32855.metal.pos.txt.gz	19	-0.008372184	0.070711803	0.905751771	0.990129705
246	246	mmfQgK	FAuf0w	CKD	M32857.metal.pos.txt.gz	8	0.109888344	0.137175505	0.423086218	0.964066887
247	247	u9oi43	T6IKAb	CKD	M32863.metal.pos.txt.gz	14	-0.073064523	0.047430467	0.123449362	0.770926299
248	248	SXAti0	0jstl1	CKD	M32867.metal.pos.txt.gz	21	0.517208753	0.398557764	0.194390149	0.891260494
249	249	WRnxTU	Qt8fft	CKD	M32869.metal.pos.txt.gz	16	-0.127228982	0.085343685	0.136018273	0.770926299
250	250	HvsHtP	cFnmqf	CKD	M32910.metal.pos.txt.gz	50	-0.101810864	0.17772695	0.566746337	0.964066887
251	251	c6lnWU	lMEoO3	CKD	M32980.metal.pos.txt.gz	11	-0.067734168	0.145413735	0.641356448	0.964066887
252	252	5IZvvt	SfGpKp	CKD	M33009.metal.pos.txt.gz	6	-0.168817603	0.0670846	0.011853087	0.25570645
253	253	rxutPJ	A807Xm	CKD	M33084.metal.pos.txt.gz	11	0.218708255	0.138355132	0.113929622	0.738263951
254	254	VguUEz	7nCr5U	CKD	M33131.metal.pos.txt.gz	13	0.02549294	0.127784551	0.841872122	0.981029293
255	255	fPBdl1	Wxq8Yy	CKD	M33132.metal.pos.txt.gz	31	0.404276796	0.230716069	0.079727429	0.6690017
256	256	ySxuBA	tQTlrm	CKD	M33137.metal.pos.txt.gz	15	0.056402265	0.066221433	0.394368295	0.964066887
257	257	e2N4zX	SBVihV	CKD	M33138.metal.pos.txt.gz	15	-0.055678833	0.095609061	0.56032464	0.964066887
258	258	euMRA5	7Gd6sn	CKD	M33140.metal.pos.txt.gz	12	-0.132372592	0.27012955	0.624110029	0.964066887
259	259	ClXDeC	ZVHUJE	CKD	M33144.metal.pos.txt.gz	8	0.01934419	0.048653743	0.690933213	0.964066887
260	260	qci9CM	DvEpld	CKD	M33150.metal.pos.txt.gz	10	0.020463695	0.046205802	0.657851442	0.964066887
261	261	mPsi9P	ZZTgfP	CKD	M33163.metal.pos.txt.gz	19	0.056580672	0.120286465	0.638081622	0.964066887
262	262	Tfznsf	2y2IJ2	CKD	M33165.metal.pos.txt.gz	14	-0.135541944	0.090491421	0.134174037	0.770926299
263	263	6EolzV	LWNd98	CKD	M33173.metal.pos.txt.gz	48	-0.006444843	0.00507902	0.204471514	0.920121813
264	264	ebQSU0	SsY8oR	CKD	M33178.metal.pos.txt.gz	479	-0.022927208	0.003894656	3.94E-09	1.91E-06
265	265	EsT2pw	fLVGd3	CKD	M33188.metal.pos.txt.gz	3	0.067900689	0.113775409	0.550643705	0.964066887
266	266	9kzBK7	xhCx4m	CKD	M33190.metal.pos.txt.gz	21	0.02349658	0.041879544	0.574762451	0.964066887
267	267	YUFjD3	DnozYH	CKD	M33192.metal.pos.txt.gz	13	-0.064449047	0.065642296	0.326187569	0.964066887
268	268	uoe5ve	zIgyCd	CKD	M33194.metal.pos.txt.gz	13	0.01682565	0.03740355	0.652825108	0.964066887
269	269	8986ll	2gUTpf	CKD	M33195.metal.pos.txt.gz	8	0.060784581	0.053169546	0.252946538	0.930674319
270	270	d1iwIU	DEOTFJ	CKD	M33197.metal.pos.txt.gz	10	-0.008712574	0.02835864	0.75866967	0.966076748
271	271	cZAymJ	rD2L3b	CKD	M33203.metal.pos.txt.gz	16	0.021254165	0.027372994	0.437474618	0.964066887
272	272	oqQJg1	KNhbd8	CKD	M33204.metal.pos.txt.gz	14	0.107688226	0.182013735	0.554085723	0.964066887
273	273	Cnf7wY	IaX8MT	CKD	M33221.metal.pos.txt.gz	18	-0.050374641	0.101292592	0.618964742	0.964066887
274	274	1zWy8d	zPOoLs	CKD	M33228.metal.pos.txt.gz	21	0.018622424	0.119099397	0.875748988	0.990129705
275	275	1A45Xo	V3jXcE	CKD	M33230.metal.pos.txt.gz	14	0.283219173	0.209777093	0.176985253	0.843663218
276	276	f4yZBd	zQtkKH	CKD	M33250.metal.pos.txt.gz	18	0.037036756	0.05689536	0.515070581	0.964066887
277	277	eLa6zW	7wGFEU	CKD	M33353.metal.pos.txt.gz	20	-0.042986254	0.036357879	0.237083044	0.930674319
278	278	ytFIAg	loHnmD	CKD	M33359.metal.pos.txt.gz	9	-0.00771038	0.045919669	0.866653941	0.990129705
279	279	DwIOsA	Jmb3h3	CKD	M33363.metal.pos.txt.gz	8	0.271445924	0.156503812	0.082840663	0.6690017
280	280	7GFH0g	fwttSt	CKD	M33364.metal.pos.txt.gz	10	-0.073082695	0.144594599	0.613255654	0.964066887
281	281	6o48f5	InC1Vu	CKD	M33380.metal.pos.txt.gz	40	-0.083741389	0.125567297	0.504833166	0.964066887
282	282	PD63Cu	aCJksr	CKD	M33384.metal.pos.txt.gz	12	-0.005328268	0.017153202	0.756083297	0.966076748
283	283	cemJDn	yJgCWR	CKD	M33389.metal.pos.txt.gz	58	-0.03887744	0.18537113	0.833880291	0.981029293
284	284	Nv3qPb	yqwDME	CKD	M33390.metal.pos.txt.gz	15	0.184753508	0.058146765	0.001486198	0.072229223
285	285	SdAOix	5MGXxs	CKD	M33391.metal.pos.txt.gz	16	0.015189007	0.025232719	0.547202885	0.964066887
286	286	taYCRz	cIh8Lg	CKD	M33408.metal.pos.txt.gz	14	-0.079749184	0.055185649	0.148427752	0.784085733
287	287	gMUJac	FjmAj1	CKD	M33415.metal.pos.txt.gz	17	-0.002207823	0.047781813	0.96314579	0.990129705
288	288	7KB9ZM	wSUkuh	CKD	M33420.metal.pos.txt.gz	13	0.144396635	0.071239285	0.042670158	0.460837706
289	289	VMikuG	QaWK2L	CKD	M33422.metal.pos.txt.gz	38	0.175589756	0.178845199	0.326199655	0.964066887
290	290	EjqIla	yM0wfq	CKD	M33423.metal.pos.txt.gz	55	-0.007317567	0.003220593	0.023079375	0.311571563
291	291	miN14q	UxPycJ	CKD	M33441.metal.pos.txt.gz	12	0.1737423	0.161330777	0.281510582	0.930708455
292	292	qMv1OB	72Pzun	CKD	M33442.metal.pos.txt.gz	28	0.109107164	0.255282652	0.669089836	0.964066887
293	293	RavBMD	4DvOry	CKD	M33443.metal.pos.txt.gz	10	-0.132325128	0.20292821	0.514350518	0.964066887
294	294	b5UzCi	y0hwIx	CKD	M33447.metal.pos.txt.gz	10	-0.308847814	0.126771355	0.014840068	0.288490922
295	295	Fyc7QG	LajKzJ	CKD	M33453.metal.pos.txt.gz	18	-0.100103989	0.105424712	0.342350822	0.964066887
296	296	wiP775	mXcFz2	CKD	M33477.metal.pos.txt.gz	48	0.294206445	0.242200006	0.224470927	0.930674319
297	297	6HGmQ4	OGYPC3	CKD	M33488.metal.pos.txt.gz	18	-0.111392806	0.074797447	0.136419057	0.770926299
298	298	IqYkNO	Sn4mvT	CKD	M33507.metal.pos.txt.gz	34	0.086317226	0.050635271	0.088253047	0.6690017
299	299	mhi5p7	vEcY7b	CKD	M33508.metal.pos.txt.gz	13	-0.078741958	0.091592246	0.389953808	0.964066887
300	300	W9k3To	uMTZob	CKD	M33509.metal.pos.txt.gz	9	0.08056037	0.154095352	0.601116513	0.964066887
301	301	Oimzum	7Pf1Th	CKD	M33510.metal.pos.txt.gz	24	0.038757564	0.104394386	0.710443142	0.964066887
302	302	y9U1Jc	Wdj2pC	CKD	M33515.metal.pos.txt.gz	45	-0.110816251	0.168873411	0.511689663	0.964066887
303	303	7nGusD	EwElVS	CKD	M33531.metal.pos.txt.gz	10	0.087392315	0.088421747	0.32297749	0.964066887
304	304	lcFOYu	kI68la	CKD	M33587.metal.pos.txt.gz	13	0.240728219	0.148254775	0.104429854	0.704901515
305	305	1G28d1	wdei3u	CKD	M33609.metal.pos.txt.gz	19	0.014795725	0.021292025	0.487121023	0.964066887
306	306	u8hRqM	ij0ooe	CKD	M33610.metal.pos.txt.gz	28	0.023405187	0.015545642	0.132175363	0.770926299
307	307	9qsl56	yVf1tT	CKD	M33627.metal.pos.txt.gz	11	0.011379877	0.111203607	0.918491803	0.990129705
308	308	GW0FMA	lSbUiT	CKD	M33633.metal.pos.txt.gz	11	-0.072327342	0.109591328	0.509271008	0.964066887
309	309	2VOTFs	dSaewe	CKD	M33637.metal.pos.txt.gz	10	0.028317327	0.058503815	0.628367905	0.964066887
310	310	h95bHJ	1U524h	CKD	M33638.metal.pos.txt.gz	10	-0.025127717	0.126309214	0.842311151	0.981029293
311	311	a9KwUo	w2wn3o	CKD	M33652.metal.pos.txt.gz	9	-0.098322537	0.08168709	0.228725493	0.930674319
312	312	l3B0th	KblFEK	CKD	M33653.metal.pos.txt.gz	14	-0.036286721	0.118287053	0.759019721	0.966076748
313	313	8n60tn	7sf8aW	CKD	M33658.metal.pos.txt.gz	9	0.03712814	0.066815558	0.578428907	0.964066887
314	314	IofVEu	Hvaw0c	CKD	M33666.metal.pos.txt.gz	24	0.408147567	0.178948686	0.02255982	0.311571563
315	315	SG66re	ua6uBa	CKD	M33675.metal.pos.txt.gz	8	0.159354911	0.066767127	0.016999104	0.304529943
316	316	7Hsmxj	WB3dZa	CKD	M33683.metal.pos.txt.gz	12	0.018962314	0.023906492	0.42766898	0.964066887
317	317	zaAInY	YWbvPM	CKD	M33751.metal.pos.txt.gz	28	0.025743743	0.013845826	0.062982597	0.592665401
318	318	b2JfvO	b1aU5o	CKD	M33782.metal.pos.txt.gz	14	0.02567253	0.047046935	0.585286529	0.964066887
319	319	9KxZ50	56dSq4	CKD	M33801.metal.pos.txt.gz	7	0.001492331	0.161545844	0.992629394	0.997006815
320	320	f8m1x5	iAUSOw	CKD	M33821.metal.pos.txt.gz	20	0.069092708	0.141511844	0.625375023	0.964066887
321	321	tdoZ1p	0NrEs9	CKD	M33822.metal.pos.txt.gz	8	0.297487365	0.153196727	0.052153443	0.539288794
322	322	0RuYsD	BN1dWh	CKD	M33833.metal.pos.txt.gz	8	-0.018650118	0.147366093	0.899291529	0.990129705
323	323	sNtroY	qlNGZ1	CKD	M33835.metal.pos.txt.gz	9	-0.038031104	0.055775012	0.495323467	0.964066887
324	324	JNoxk2	emB9OJ	CKD	M33864.metal.pos.txt.gz	9	-0.011908637	0.047120938	0.800480753	0.977471472
325	325	uZCJl3	DZkpLY	CKD	M33871.metal.pos.txt.gz	13	-0.048741572	0.097092469	0.615659168	0.964066887
326	326	zduHid	ItMAmk	CKD	M33877.metal.pos.txt.gz	31	0.029623545	0.012420576	0.017077364	0.304529943
327	327	RV5YWR	dK6cDv	CKD	M33883.metal.pos.txt.gz	14	-0.019817474	0.048262174	0.681350286	0.964066887
328	328	Uxp0cz	kXJDm5	CKD	M33884.metal.pos.txt.gz	12	-0.138921437	0.125996492	0.270208826	0.930674319
329	329	kZFvaH	RU39Ae	CKD	M33885.metal.pos.txt.gz	13	-0.005513387	0.054011095	0.918694139	0.990129705
330	330	xGSvtz	RJNfPQ	CKD	M33892.metal.pos.txt.gz	30	-0.03491763	0.110423972	0.751839913	0.966076748
331	331	owlXWp	ng4tEC	CKD	M33901.metal.pos.txt.gz	21	0.03956688	0.089711462	0.65917971	0.964066887
332	332	I3k8Da	kUT3Te	CKD	M33910.metal.pos.txt.gz	13	0.180209755	0.084077274	0.032082399	0.380293803
333	333	8XyC39	VeRESg	CKD	M33935.metal.pos.txt.gz	11	0.091948977	0.127148829	0.469581446	0.964066887
334	334	pKRuIk	PF4nP3	CKD	M33936.metal.pos.txt.gz	18	-0.009186444	0.091237561	0.919798862	0.990129705
335	335	EonCr4	Odlugo	CKD	M33937.metal.pos.txt.gz	15	0.147152737	0.147224225	0.317545554	0.964066887
336	336	kBhfLS	R8Giom	CKD	M33939.metal.pos.txt.gz	13	-0.059938463	0.186444972	0.747846124	0.964066887
337	337	6lXSnO	IMiMrZ	CKD	M33941.metal.pos.txt.gz	15	0.011391299	0.078610558	0.884783506	0.990129705
338	338	cusfcw	emfTEm	CKD	M33955.metal.pos.txt.gz	33	-0.067458794	0.263305322	0.797796496	0.9766476
339	339	O60rGX	oqKMHs	CKD	M33957.metal.pos.txt.gz	10	-0.144127838	0.160164918	0.368188661	0.964066887
340	340	yMmw1U	OP2Ilz	CKD	M33960.metal.pos.txt.gz	16	0.109925117	0.187756811	0.558234825	0.964066887
341	341	QoD5J9	tQCjVc	CKD	M33961.metal.pos.txt.gz	12	-0.163494431	0.183752327	0.373597806	0.964066887
342	342	yRvoT0	NxnipY	CKD	M33968.metal.pos.txt.gz	19	0.015554475	0.107592749	0.885051916	0.990129705
343	343	HngXCg	AzhFX5	CKD	M33969.metal.pos.txt.gz	11	-0.126669061	0.152390255	0.405852199	0.964066887
344	344	TmElpr	cDmvBE	CKD	M33971.metal.pos.txt.gz	6	-0.128403207	0.288959321	0.656779218	0.964066887
345	345	ixYOrr	xCry2Y	CKD	M33972.metal.pos.txt.gz	7	-0.214338778	0.195258378	0.272327329	0.930674319
346	346	NjzvXx	JkEPUJ	CKD	M33973.metal.pos.txt.gz	12	-0.017669112	0.054450206	0.745559247	0.964066887
347	347	ZUhKaq	Qbc0Il	CKD	M34035.metal.pos.txt.gz	5	-0.069723939	0.188159932	0.710967678	0.964066887
348	348	6iHnP9	JtTZZR	CKD	M34040.metal.pos.txt.gz	16	0.338867358	0.110977868	0.002262129	0.078681913
349	349	9OTFj3	Up1fow	CKD	M34062.metal.pos.txt.gz	31	-0.344137069	0.227540651	0.130427009	0.770926299
350	350	ZTSiED	A2rMPt	CKD	M34106.metal.pos.txt.gz	16	0.028829964	0.060134414	0.631636045	0.964066887
351	351	D8k4zg	zwzrsY	CKD	M34109.metal.pos.txt.gz	34	-0.008751534	0.005962903	0.142195688	0.780450559
352	352	vGp4rR	dvi2N5	CKD	M34112.metal.pos.txt.gz	18	0.123986097	0.072627328	0.087793268	0.6690017
353	353	qrjcrc	droMkV	CKD	M34123.metal.pos.txt.gz	21	-0.13111766	0.158816348	0.409035023	0.964066887
354	354	RlO71D	Ijiea7	CKD	M34214.metal.pos.txt.gz	20	0.021192072	0.136466925	0.876591985	0.990129705
355	355	Cg3npz	xqVwX5	CKD	M34221.metal.pos.txt.gz	11	0.032568942	0.11804595	0.782624453	0.972776174
356	356	PxSrri	e8Rqf1	CKD	M34244.metal.pos.txt.gz	24	-0.111788005	0.153196553	0.465571663	0.964066887
357	357	lRllho	lEy5dQ	CKD	M34245.metal.pos.txt.gz	20	-0.209844317	0.060553086	0.000529325	0.02858355
358	358	SkPWTQ	fS0LZR	CKD	M34283.metal.pos.txt.gz	43	0.052977895	0.129038379	0.681395778	0.964066887
359	359	3RCvdD	WhLPOF	CKD	M34289.metal.pos.txt.gz	14	-0.032936887	0.09580786	0.731011263	0.964066887
360	360	zh2XId	lZXRfZ	CKD	M34306.metal.pos.txt.gz	26	-0.089656689	0.052463784	0.087464787	0.6690017
361	361	YgE2Ya	c65P2E	CKD	M34314.metal.pos.txt.gz	12	0.14017093	0.037470198	0.000183388	0.011140821
362	362	vt4Xmg	mHAJOn	CKD	M34322.metal.pos.txt.gz	40	-0.012005932	0.014375469	0.403623113	0.964066887
363	363	4kk2x9	EiLTru	CKD	M34327.metal.pos.txt.gz	9	0.085827389	0.028060562	0.00222338	0.078681913
364	364	s19yJY	BPHQw4	CKD	M34329.metal.pos.txt.gz	12	0.049929724	0.078035405	0.522280372	0.964066887
365	365	Rrt5Dg	VJk19a	CKD	M34336.metal.pos.txt.gz	21	0.068166491	0.057251982	0.233795	0.930674319
366	366	2QFDWc	NKwM9s	CKD	M34338.metal.pos.txt.gz	42	0.00260289	0.00661236	0.693846778	0.964066887
367	367	IP3Adz	7LvQRy	CKD	M34339.metal.pos.txt.gz	20	0.016334346	0.025341265	0.519202634	0.964066887
368	368	iO4mvP	uySLvE	CKD	M34344.metal.pos.txt.gz	12	0.087394821	0.047080464	0.063412759	0.592665401
369	369	0ncMeN	IziUU3	CKD	M34350.metal.pos.txt.gz	13	0.057129064	0.055835834	0.306231593	0.964066887
370	370	f2Ym3v	egRetw	CKD	M34359.metal.pos.txt.gz	45	0.217568963	0.162473599	0.180536985	0.843663218
371	371	1amhpB	ZZnpTB	CKD	M34365.metal.pos.txt.gz	67	-0.002070428	0.008957683	0.817210475	0.980831497
372	372	zQShTG	51RhXP	CKD	M34384.metal.pos.txt.gz	7	-0.053168724	0.06170643	0.388885695	0.964066887
373	373	sL1esY	b3P2SO	CKD	M34389.metal.pos.txt.gz	13	-0.131251747	0.097036417	0.1761825	0.843663218
374	374	tEiPNs	DisEFB	CKD	M34390.metal.pos.txt.gz	10	-0.051484814	0.08301642	0.535141739	0.964066887
375	375	P3XxG9	vKabxE	CKD	M34395.metal.pos.txt.gz	17	-0.027967674	0.067812111	0.68002509	0.964066887
376	376	EJ0On6	mjdyao	CKD	M34400.metal.pos.txt.gz	13	-0.008733609	0.074026234	0.906083572	0.990129705
377	377	3cnSNP	KqhLjr	CKD	M34404.metal.pos.txt.gz	10	0.028093704	0.02685737	0.295545652	0.963994543
378	378	cJOLbl	1GpmXd	CKD	M34407.metal.pos.txt.gz	21	-0.085659949	0.098176555	0.382930642	0.964066887
379	379	LYilZW	RW5Gu6	CKD	M34409.metal.pos.txt.gz	6	-0.053462638	0.262688248	0.838727647	0.981029293
380	380	TpBzi2	84IMFs	CKD	M34416.metal.pos.txt.gz	14	-0.064370665	0.169477638	0.704080484	0.964066887
381	381	h3zemY	NmVh9r	CKD	M34419.metal.pos.txt.gz	15	0.027083794	0.17876718	0.879578814	0.990129705
382	382	VExCom	HtcMhX	CKD	M34420.metal.pos.txt.gz	22	0.111937698	0.04160391	0.007133281	0.176619836
383	383	E2hsZL	8nv8wD	CKD	M34441.metal.pos.txt.gz	17	-0.005477531	0.077773506	0.943851997	0.990129705
384	384	Aeb5Lj	sKUP7A	CKD	M34453.metal.pos.txt.gz	3	-0.671054498	1.266457751	0.596203968	0.964066887
385	385	zCXj5N	NmQ1hx	CKD	M34456.metal.pos.txt.gz	26	-0.143682311	0.170909329	0.400519831	0.964066887
386	386	kEn0ku	m8W7XD	CKD	M34469.metal.pos.txt.gz	11	-0.147938734	0.135195068	0.273840386	0.930674319
387	387	2kSPsU	a4hvAm	CKD	M34481.metal.pos.txt.gz	13	0.218577339	0.099616693	0.028222196	0.351691981
388	388	ftdj3m	S63bgc	CKD	M34499.metal.pos.txt.gz	7	-0.116324358	0.107017789	0.277053241	0.930708455
389	389	jO7sFI	TfZTgw	CKD	M34513.metal.pos.txt.gz	13	0.03970592	0.064898312	0.540658538	0.964066887
390	390	FKr8hc	w9XqHl	CKD	M34516.metal.pos.txt.gz	19	0.011493774	0.023779567	0.628849614	0.964066887
391	391	VG9SVz	yF6klb	CKD	M34527.metal.pos.txt.gz	16	0.010756935	0.142854569	0.939976097	0.990129705
392	392	ZJiWtQ	esJgFw	CKD	M34530.metal.pos.txt.gz	10	0.087339799	0.047923569	0.068382018	0.627050203
393	393	rnUX0m	Q1HQ7d	CKD	M34533.metal.pos.txt.gz	15	0.044834202	0.083704824	0.592219353	0.964066887
394	394	hPPdEo	0XwZnA	CKD	M34534.metal.pos.txt.gz	13	-0.051007109	0.126210673	0.686107865	0.964066887
395	395	z3SkvO	T3fMls	CKD	M34535.metal.pos.txt.gz	8	0.0223882	0.013062545	0.086542821	0.6690017
396	396	IZ3kIf	JcqHse	CKD	M34539.metal.pos.txt.gz	20	0.074036772	0.092799543	0.424978449	0.964066887
397	397	QqNtFx	2Sf7od	CKD	M34674.metal.pos.txt.gz	12	0.168838742	0.106541893	0.11303066	0.738263951
398	398	HwQhue	sHaznL	CKD	M34732.metal.pos.txt.gz	4	0.227755801	0.590434433	0.6996872	0.964066887
399	399	LUqLSK	sNruhk	CKD	M34761.metal.pos.txt.gz	17	-0.137545621	0.074033104	0.063184143	0.592665401
400	400	PREXtw	jHPuZu	CKD	M34878.metal.pos.txt.gz	10	0.348418429	0.086812359	5.98E-05	0.00625968
401	401	touhIV	d3Uxv4	CKD	M34912.metal.pos.txt.gz	47	0.034705744	0.140822469	0.805333649	0.980831497
402	402	i1MoCb	cSyU7i	CKD	M35114.metal.pos.txt.gz	11	0.073377109	0.11485883	0.522923093	0.964066887
403	403	lxAy4s	c3PREO	CKD	M35126.metal.pos.txt.gz	18	-0.002657506	0.108929976	0.980536368	0.996947019
404	404	cM66s3	9W44yQ	CKD	M35127.metal.pos.txt.gz	18	-0.421345922	0.139861992	0.002590342	0.078681913
405	405	2V1ktq	LEmxgI	CKD	M35137.metal.pos.txt.gz	61	0.060732952	0.121053986	0.615877591	0.964066887
406	406	taDEnw	QeFhxy	CKD	M35159.metal.pos.txt.gz	9	0.097041173	0.098253114	0.323316686	0.964066887
407	407	rQJdiL	PcqLWz	CKD	M35160.metal.pos.txt.gz	12	0.259450076	0.168935552	0.124589103	0.770926299
408	408	P6bOjj	cZfwC9	CKD	M35186.metal.pos.txt.gz	26	0.036862416	0.139122257	0.791037048	0.972800651
409	409	4soXut	9RuuDU	CKD	M35187.metal.pos.txt.gz	9	-0.000429506	0.033355755	0.989726307	0.997006815
410	410	hZx73n	EIUQxY	CKD	M35189.metal.pos.txt.gz	16	0.081102332	0.081233584	0.318093065	0.964066887
411	411	EVpPIn	C5NpXy	CKD	M35193.metal.pos.txt.gz	25	-0.134151585	0.114837195	0.242730409	0.930674319
412	412	tqSUqk	CJhXkS	CKD	M35240.metal.pos.txt.gz	8	0.702908981	0.424121624	0.097453018	0.681228095
413	413	JsSWbQ	DuYJL3	CKD	M35253.metal.pos.txt.gz	24	0.120824968	0.12364497	0.32847374	0.964066887
414	414	Wnzckp	QWedAP	CKD	M35254.metal.pos.txt.gz	17	-0.146920313	0.168128013	0.382194607	0.964066887
415	415	6Adng7	7fAMVw	CKD	M35255.metal.pos.txt.gz	12	0.002090098	0.131171145	0.987286941	0.997006815
416	416	kqd29E	PoeYe9	CKD	M35257.metal.pos.txt.gz	20	0.034883697	0.159874837	0.827278119	0.981029293
417	417	Sqr3dU	IQndmv	CKD	M35270.metal.pos.txt.gz	41	0.020718928	0.205063614	0.919521416	0.990129705
418	418	GCoVFb	ikUV1K	CKD	M35305.metal.pos.txt.gz	11	0.004014856	0.154182282	0.979225696	0.996947019
419	419	MhA8sZ	Ab3aF7	CKD	M35320.metal.pos.txt.gz	12	-0.038508447	0.128661376	0.764710581	0.966076748
420	420	5EmN3A	ZkK82S	CKD	M35322.metal.pos.txt.gz	17	0.084099635	0.036856652	0.022500948	0.311571563
421	421	Byslgj	wA8kb4	CKD	M35326.metal.pos.txt.gz	45	-0.016419026	0.160339857	0.918438073	0.990129705
422	422	4aBZsP	hJT9Jg	CKD	M35327.metal.pos.txt.gz	20	0.083096443	0.316114811	0.792652382	0.972800651
423	423	IEF5wI	VZCdWt	CKD	M35331.metal.pos.txt.gz	8	0.347137568	0.296570612	0.241797554	0.930674319
424	424	EmPBiB	DYxJpQ	CKD	M35397.metal.pos.txt.gz	31	-0.035772592	0.194783826	0.854285852	0.988530772
425	425	jwZEex	KbJB0k	CKD	M35431.metal.pos.txt.gz	26	0.041363172	0.317433973	0.89632528	0.990129705
426	426	72VSq5	ohFUEi	CKD	M35433.metal.pos.txt.gz	8	-0.088083148	0.130804937	0.500697211	0.964066887
427	427	6QCMca	zJVpHD	CKD	M35439.metal.pos.txt.gz	35	0.059975931	0.136721334	0.660898636	0.964066887
428	428	cgjn9X	fe1V5p	CKD	M35451.metal.pos.txt.gz	18	-0.007902894	0.015739844	0.615600808	0.964066887
429	429	mxBfc6	yyRQXj	CKD	M35464.metal.pos.txt.gz	15	0.145877022	0.239613215	0.54265564	0.964066887
430	430	jwChbb	DJwxnw	CKD	M35472.metal.pos.txt.gz	19	-0.061730332	0.096880071	0.524005667	0.964066887
431	431	j5vUUC	kHo4qA	CKD	M35527.metal.pos.txt.gz	8	-0.073701105	0.082373667	0.370938487	0.964066887
432	432	ByWJvy	UPNByz	CKD	M35551.metal.pos.txt.gz	12	0.074329298	0.069629513	0.285747459	0.938332872
433	433	sVWNiS	6intoO	CKD	M35626.metal.pos.txt.gz	6	-0.467201089	0.317755591	0.141476225	0.780450559
434	434	ap9wKv	G7f6Jf	CKD	M35628.metal.pos.txt.gz	10	-0.341397986	0.364629868	0.349125748	0.964066887
435	435	Y1iET9	m0W3xI	CKD	M35631.metal.pos.txt.gz	28	-0.077194244	0.133528051	0.563188127	0.964066887
436	436	YzFLbu	UjSP9M	CKD	M35635.metal.pos.txt.gz	11	0.017021888	0.045140771	0.70611077	0.964066887
437	437	0ToVka	tiqKGT	CKD	M35669.metal.pos.txt.gz	21	0.072835238	0.058302922	0.211571686	0.930674319
438	438	wC6sBR	KuS1iV	CKD	M35675.metal.pos.txt.gz	47	-0.012043874	0.141593266	0.932213966	0.990129705
439	439	EjPlIx	WVHyBV	CKD	M35678.metal.pos.txt.gz	25	0.10700281	0.06301063	0.089475536	0.6690017
440	440	fFYbm9	wDatn2	CKD	M35718.metal.pos.txt.gz	23	0.01624288	0.104819616	0.876852607	0.990129705
441	441	37iRBv	7x0DFm	CKD	M35754.metal.pos.txt.gz	43	0.210754368	0.14772537	0.153676961	0.794542586
442	442	ukfINv	Y1TUAh	CKD	M35854.metal.pos.txt.gz	13	0.108506206	0.148649482	0.465422735	0.964066887
443	443	vRIPqs	gdZgP2	CKD	M35977.metal.pos.txt.gz	8	-0.345024182	0.238040041	0.147215418	0.784085733
444	444	shiy3T	WmYKRK	CKD	M35978.metal.pos.txt.gz	18	-0.048877954	0.131712187	0.710565529	0.964066887
445	445	Rgbxl7	vOWkIY	CKD	M36009.metal.pos.txt.gz	14	-0.234069662	0.058575381	6.44E-05	0.00625968
446	446	geQ3J5	1lVt9q	CKD	M36095.metal.pos.txt.gz	5	0.081402937	0.038793758	0.035874115	0.405460928
447	447	YkQFTg	dbclE9	CKD	M36097.metal.pos.txt.gz	30	0.001740186	0.005153608	0.735616739	0.964066887
448	448	X7dzYL	BJm7Pn	CKD	M36098.metal.pos.txt.gz	10	-0.0061177	0.088850111	0.945105703	0.990129705
449	449	8r7wST	98uRKe	CKD	M36099.metal.pos.txt.gz	7	-0.070554629	0.134407796	0.599632141	0.964066887
450	450	Au2AHv	QpYesX	CKD	M36103.metal.pos.txt.gz	15	0.011387406	0.069177199	0.869249284	0.990129705
451	451	mC13Ve	v43UFB	CKD	M36115.metal.pos.txt.gz	13	-0.012697275	0.048275607	0.792537953	0.972800651
452	452	AJaT7P	bE706M	CKD	M36131.metal.pos.txt.gz	18	0.003307575	0.07324101	0.963979657	0.990129705
453	453	ijIa10	Rg121O	CKD	M36134.metal.pos.txt.gz	14	0.011200497	0.071957821	0.876306038	0.990129705
454	454	kN6t6n	q5bXhJ	CKD	M36230.metal.pos.txt.gz	21	-0.045696193	0.054654499	0.403103112	0.964066887
455	455	7BUXZ6	6TYuQf	CKD	M36300.metal.pos.txt.gz	9	0.019323169	0.202787488	0.924086252	0.990129705
456	456	NttyPk	9LxIkt	CKD	M36376.metal.pos.txt.gz	5	-0.274015376	0.138131689	0.047286431	0.499591423
457	457	nnz0Z8	O1UsAO	CKD	M36399.metal.pos.txt.gz	13	-0.277291379	0.103301402	0.007268306	0.176619836
458	458	H6iZ9F	IM0LUc	CKD	M36468.metal.pos.txt.gz	16	0.072840789	0.06385739	0.254003497	0.930674319
459	459	C19fVg	YgezYf	CKD	M36515.metal.pos.txt.gz	10	0.279523952	0.813160562	0.731034297	0.964066887
460	460	zeedKT	cWkcIh	CKD	M36552.metal.pos.txt.gz	20	-0.015848465	0.230943604	0.945288257	0.990129705
461	461	HbNU26	5xkH9z	CKD	M36553.metal.pos.txt.gz	18	4.42E-06	0.073237807	0.999951901	0.999951901
462	462	2ZjRHI	MO8Rhg	CKD	M36559.metal.pos.txt.gz	17	0.084581677	0.060512314	0.162185222	0.821062686
463	463	rpUO1W	4nCn4A	CKD	M36585.metal.pos.txt.gz	11	-0.070402375	0.079986403	0.378762198	0.964066887
464	464	FL6IMY	ulqekd	CKD	M36589.metal.pos.txt.gz	19	-0.022289888	0.044083488	0.613117152	0.964066887
465	465	Ojk0lh	SqvRMk	CKD	M36673.metal.pos.txt.gz	13	-0.236750432	0.115759428	0.040835783	0.451049785
466	466	hSyc7g	PjPBus	CKD	M36738.metal.pos.txt.gz	10	-0.0560436	0.05439924	0.302903168	0.964066887
467	467	9ZajZE	SBUEw7	CKD	M36754.metal.pos.txt.gz	10	-0.181044662	0.164953371	0.272400798	0.930674319
468	468	YxlWYP	LM4xqK	CKD	M36756.metal.pos.txt.gz	11	0.084346131	0.119630178	0.480774576	0.964066887
469	469	i45oMH	X4xC6F	CKD	M36776.metal.pos.txt.gz	16	0.032587673	0.235196174	0.88980158	0.990129705
470	470	hxCM08	jmzrE6	CKD	M36802.metal.pos.txt.gz	10	-0.19608334	0.123361178	0.111946188	0.738263951
471	471	w10L4o	DD4TFQ	CKD	M36808.metal.pos.txt.gz	35	0.163349806	0.245350461	0.50555075	0.964066887
472	472	51bLC3	9ZQ9Mk	CKD	M36850.metal.pos.txt.gz	11	-0.082246638	0.071482551	0.249903654	0.930674319
473	473	YLoFZr	rsRPff	CKD	M37004.metal.pos.txt.gz	9	-0.247948813	0.108756801	0.022616793	0.311571563
474	474	9n91Gl	sA4R1a	CKD	M37058.metal.pos.txt.gz	44	0.302130346	0.120841295	0.012411469	0.25570645
475	475	VZolGR	FzAzai	CKD	M37097.metal.pos.txt.gz	13	-0.02986913	0.053554235	0.577024609	0.964066887
476	476	do8xTj	7gYruC	CKD	M37104.metal.pos.txt.gz	15	-0.034974893	0.040240491	0.384766844	0.964066887
477	477	6ZuXPU	K67Pef	CKD	M37112.metal.pos.txt.gz	13	0.021132132	0.033865613	0.532627798	0.964066887
478	478	TLYUxh	6Gzz6d	CKD	M37190.metal.pos.txt.gz	17	0.038580269	0.056857056	0.497424001	0.964066887
479	479	hpmytj	IGuI30	CKD	M37202.metal.pos.txt.gz	22	-0.005901084	0.043461595	0.891997595	0.990129705
480	480	giFgs3	f3VwlQ	CKD	M37203.metal.pos.txt.gz	19	0.041291037	0.126365188	0.743849726	0.964066887
481	481	enmyKl	bI6dxF	CKD	M37253.metal.pos.txt.gz	13	0.16388898	0.122381267	0.180516246	0.843663218
482	482	CQ7InG	mlT1iw	CKD	M37459.metal.pos.txt.gz	3	-0.200879723	0.066851736	0.002657081	0.078681913
483	483	JgDYO2	wLUWbb	CKD	M37506.metal.pos.txt.gz	48	0.040047902	0.173410812	0.817359581	0.980831497
484	484	r4hZrt	vQH2PN	CKD	M38150.metal.pos.txt.gz	4	0.106181849	0.194249801	0.584636206	0.964066887
485	485	mc0fDO	d3fQ13	CKD	M38178.metal.pos.txt.gz	10	-0.035833541	0.129388178	0.781821554	0.972776174
486	486	YIceBM	06Ts2U	CKD	M38768.metal.pos.txt.gz	14	0.10051303	0.157826678	0.52421797	0.964066887
